# Supplementary material for: Mo10V2@MIL-101: pseudo-capacitive and redox-active efficient anode material for high-rate lithium cluster batteries
Source: Royal Society of Chemistry journal article supplement (doi:10.1039/d2nj03426c), 2023-01-01
Supplement: d2nj03426c1.pdf [file d2nj03426c1.pdf]

## **Mo<sub>10</sub>V<sub>2</sub>@MIL-101: Pseudo-capacitive and Redox-active Efficient Anode Material for High-rate Lithium Cluster Batteries**

*Marimuthu Priyadarshini<sup>a</sup>, Swaminathan Shanmugan<sup>\*a</sup>, Chang Woo Lee<sup>b</sup>, and Kumaran Vediappan<sup>\*a</sup>*

<sup>a</sup>Electrochemical Energy Storage and Conversion Laboratory (EESCL), Department of Chemistry, Faculty of Engineering and Technology, SRM Institute of Science and Technology, Kattankulathur-603203, Tamil Nadu, India.

<sup>b</sup>Department of Chemical Engineering and Green Energy Centre, College of Engineering, Kyung Hee University, 1 Seochun, Gihung, Yongin 446-701, Republic of Korea

E-mail: [shanmugs2@srmist.edu.in](mailto:shanmugs2@srmist.edu.in), [kumaranv@srmist.edu.in](mailto:kumaranv@srmist.edu.in)

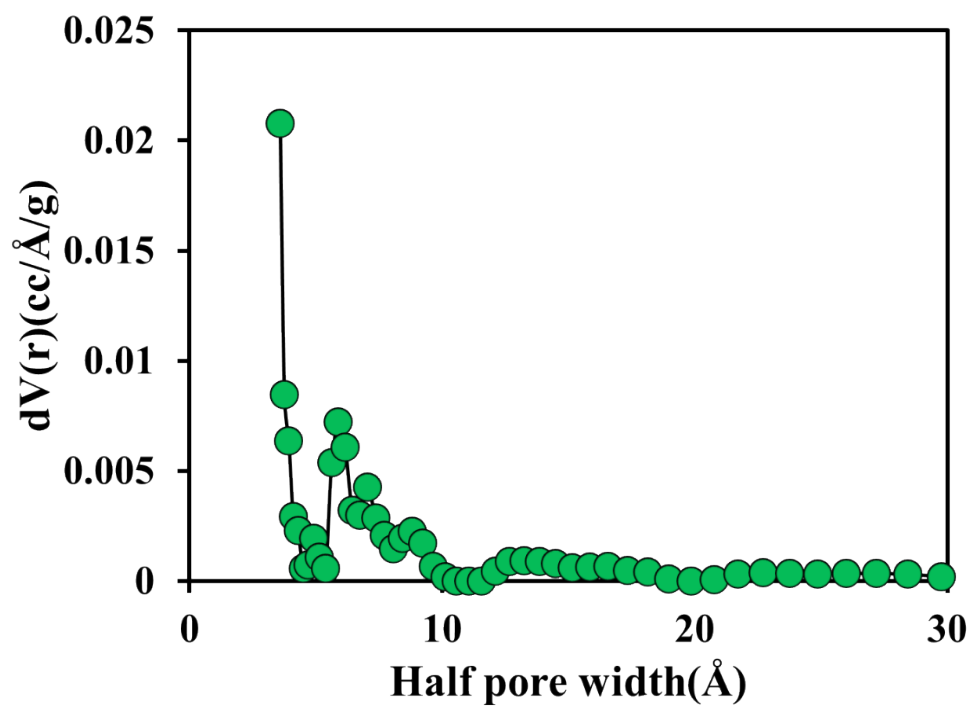

Figure. S1 Pore size distribution of Mo<sub>10</sub>V<sub>2</sub>@MIL-101.

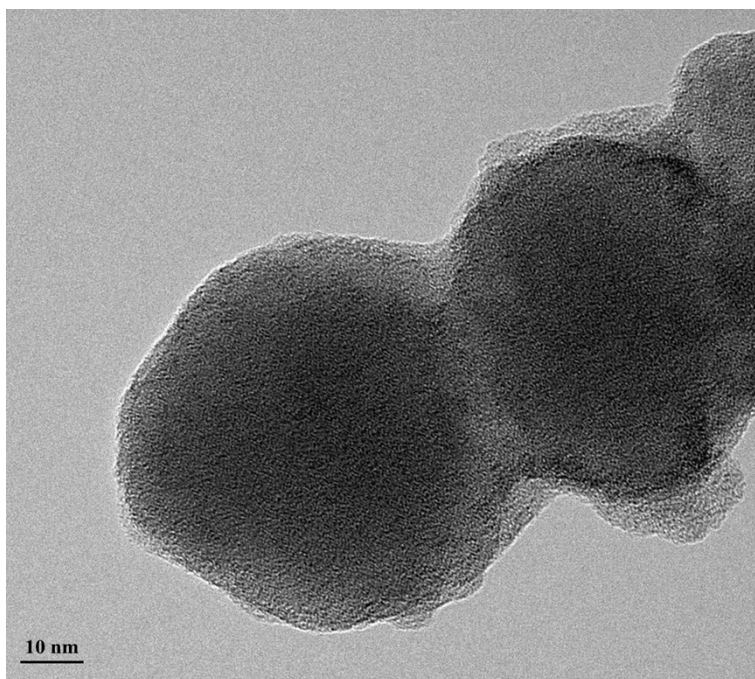

Figure. S2 HRTEM image of Mo<sub>10</sub>V<sub>2</sub>.

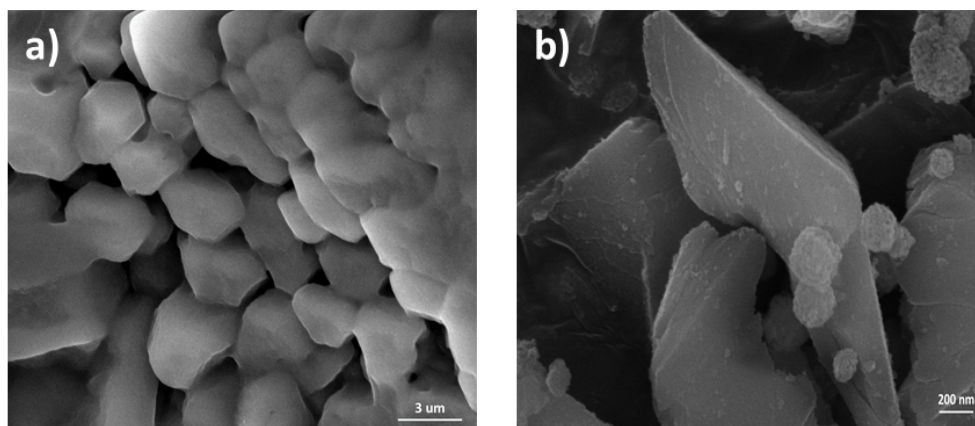

**Figure. S3** FESEM images of  $\text{Mo}_{10}\text{V}_2@\text{MIL-101}$  a) top view, b) side view.

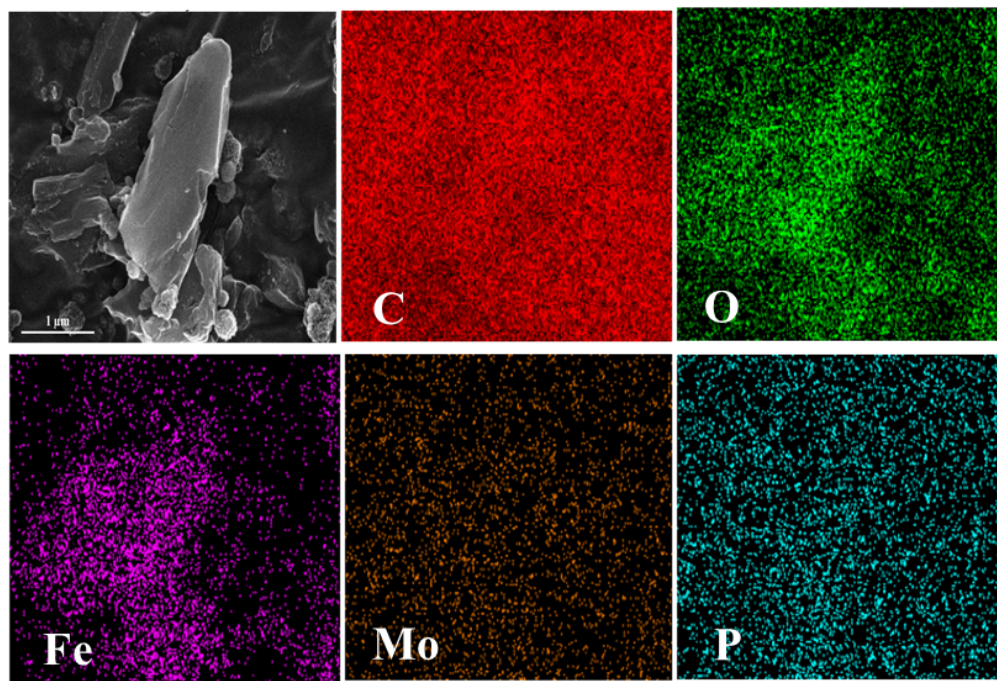

**Figure. S4** FESEM image of  $\text{Mo}_{10}\text{V}_2@\text{MIL-101}$  and the corresponding elemental mapping: red, green, violet, brown and blue indicates carbon, oxygen, iron, molybdenum and phosphorus.

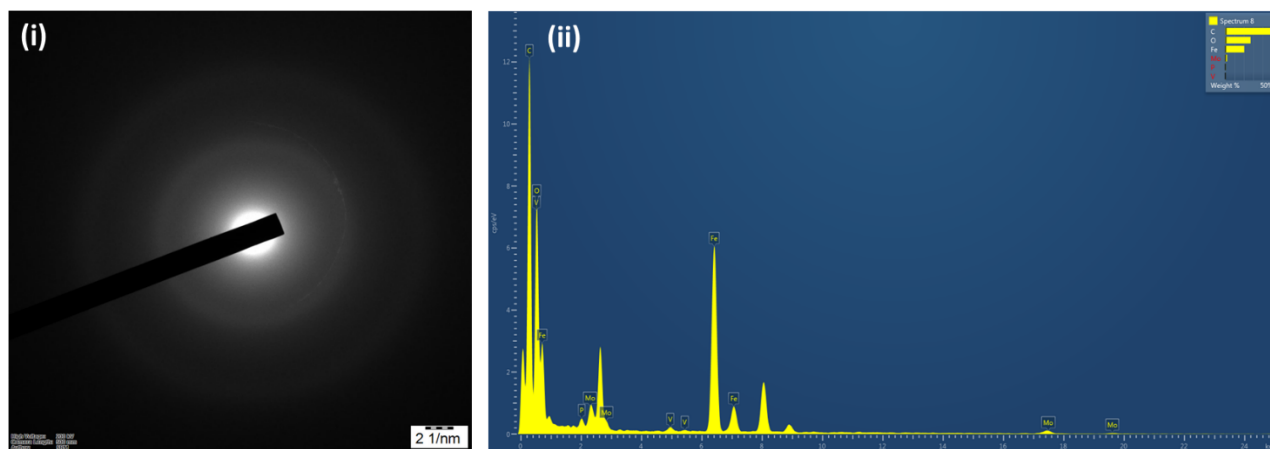

**Figure. S5** i) Electron diffraction pattern and ii) HRTEM EDAX of  $\text{Mo}_{10}\text{V}_2\text{@MIL-101}$

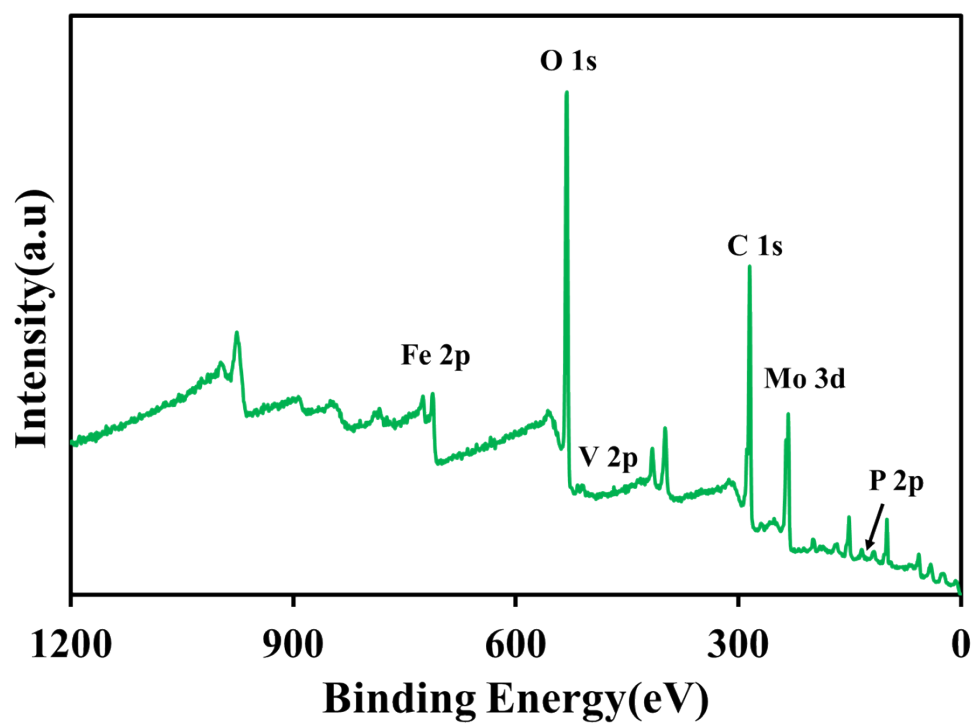

**Figure. S6** XPS survey spectra of  $\text{Mo}_{10}\text{V}_2\text{@MIL-101}$ .

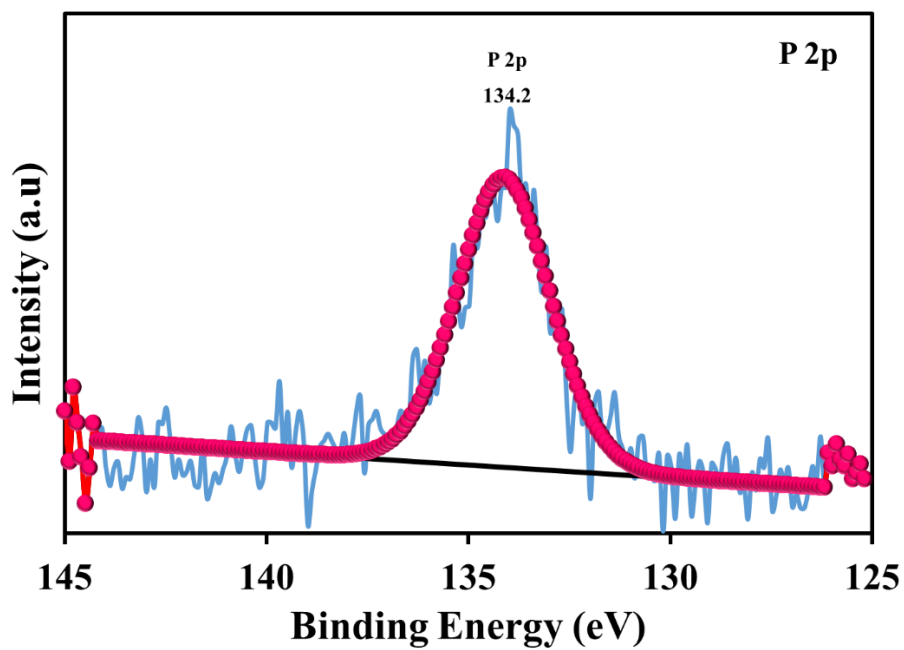

Figure. S7 XPS High resolution spectra P of  $\text{Mo}_{10}\text{V}_2@\text{MIL-101}$ .

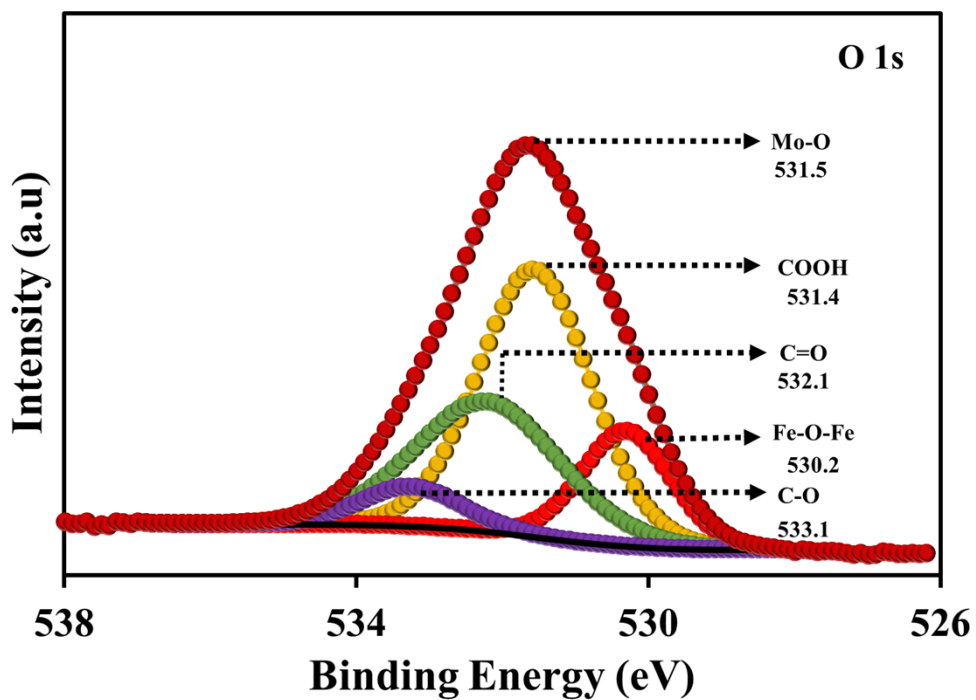

Figure. S8 XPS High resolution spectra O of  $\text{Mo}_{10}\text{V}_2@\text{MIL-101}$ .

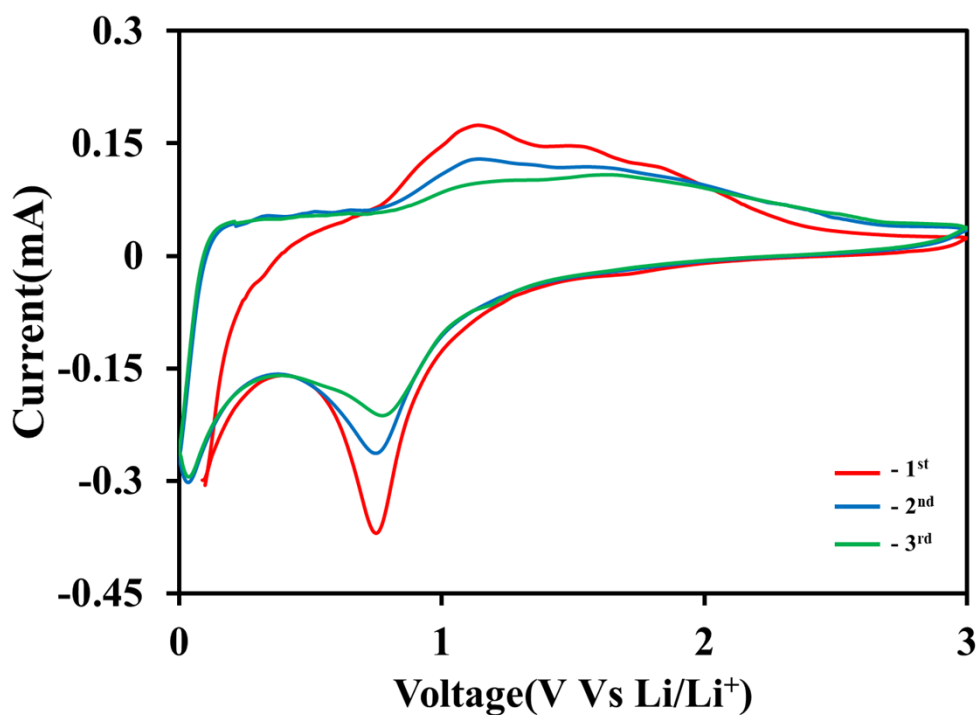

**Figure. S9** CV of MIL-101(Fe) between the potential window 0.0-3.0V at a scan rate of 0.1 mV s<sup>-1</sup>.

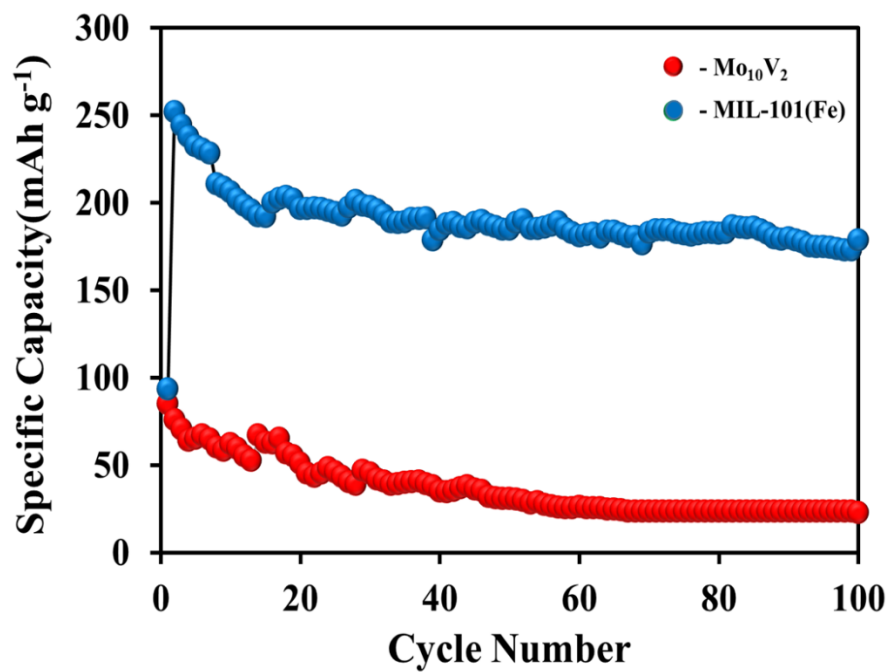

**Figure. S10** Life cycle performance of Mo<sub>10</sub>V<sub>2</sub> and MIL-101(Fe) at 1000 mA g<sup>-1</sup>.

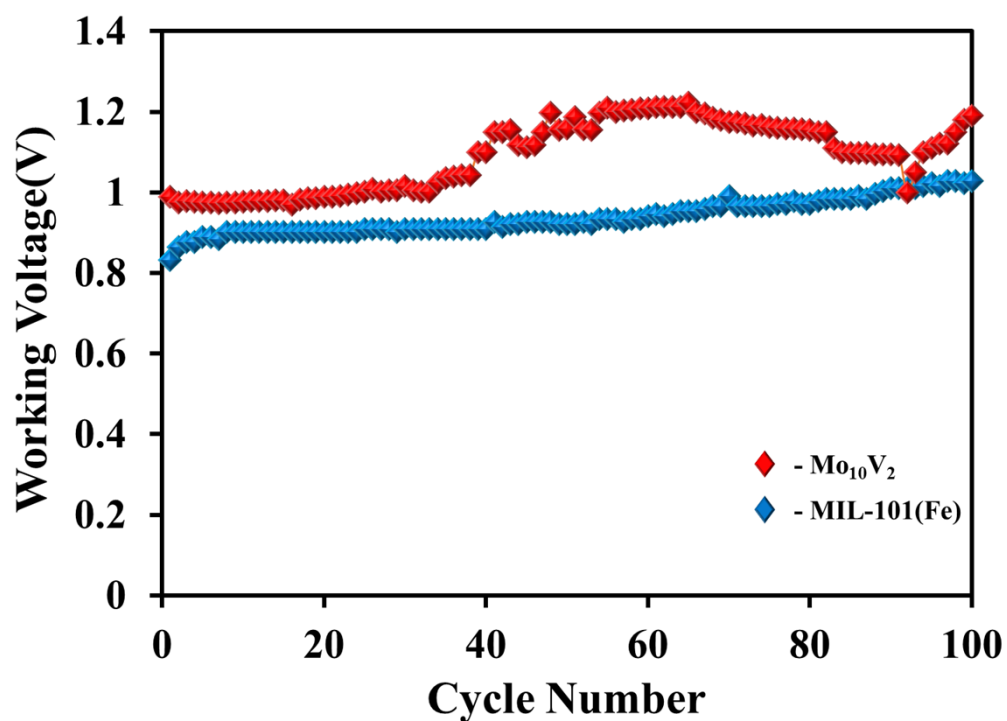

Figure. S11 Cycle number Vs Working voltage of Mo<sub>10</sub>V<sub>2</sub> and MIL-101(Fe).

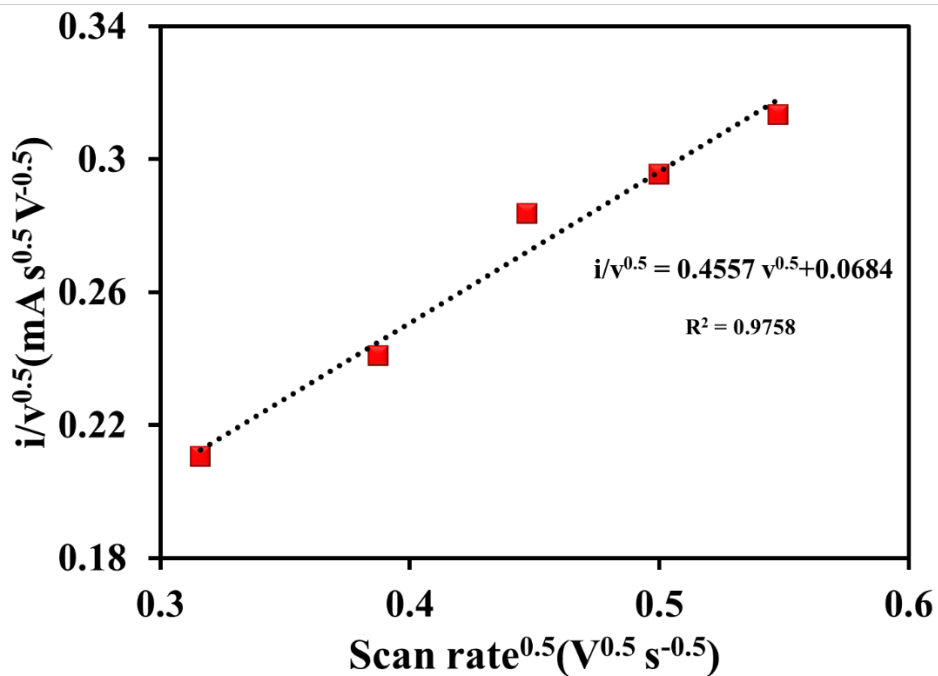

Figure S12. Linear fitting of plot of  $i/v^{1/2}$  versus  $v^{1/2}$  for first oxidation-reduction peak and second oxidation reduction peak.

**Table 1.** Comparison of charge/discharge capacity of various POM@MOF and POMOF compounds with this work

| Material                                                                                                                                                                                                            | Rate/CD<br>(C/mA g <sup>-1</sup> ) | RC<br>(mAh g <sup>-1</sup> ) | Cycles | CE<br>(%) | Ref          |
|---------------------------------------------------------------------------------------------------------------------------------------------------------------------------------------------------------------------|------------------------------------|------------------------------|--------|-----------|--------------|
| POMOF-1                                                                                                                                                                                                             | 1.25 C                             | 350                          | 500    | 62.2      | 1            |
| [Ag <sub>26</sub> (Trz) <sub>16</sub> (OH) <sub>4</sub> ][P <sub>2</sub> W <sub>18</sub> O <sub>62</sub> ]                                                                                                          | 100                                | 550                          | 100    |           | 2            |
| Na[Ag <sub>16</sub> (Trz) <sub>9</sub> (H <sub>2</sub> O) <sub>4</sub> ][P <sub>2</sub> W <sub>18</sub> O <sub>62</sub> ].H <sub>2</sub> O                                                                          | 100                                | 600                          | 100    |           |              |
| [PMoV <sub>8</sub> Mo <sup>VI</sup> <sub>4</sub> O <sub>37</sub> (OH) <sub>3</sub> Zn <sub>4</sub> ][TPT].2TPT.2H <sub>2</sub> O                                                                                    | 50                                 | 750                          | 200    | 61.3      | 3            |
| (TBA) <sub>3</sub> [PMoV <sub>8</sub> Mo <sup>VI</sup> <sub>4</sub> O <sub>38</sub> (OH) <sub>2</sub> Zn <sub>4</sub> (PBA) <sub>2</sub> ].H <sub>2</sub> O                                                         | 100                                | 640                          | 100    | 56.2      | 4            |
| POMOFs/RGO                                                                                                                                                                                                          | 50                                 | 1075                         | 400    |           | 5            |
| CoW-MO10V2                                                                                                                                                                                                          | 100                                | 737                          | 100    | 72        | 6            |
| PMo <sub>12</sub> @FeBTC                                                                                                                                                                                            | 100                                | 658                          | 50     | 49.0      | 7            |
| H <sub>2</sub> [Cu <sup>II</sup> <sub>4</sub> (Htrz) <sub>5</sub> (H <sub>2</sub> O) <sub>2</sub> ][Mo <sup>VI</sup> <sub>4</sub> Cu <sup>II</sup> <sub>4</sub> O <sub>26</sub> ] <sub>0.5</sub> ·3H <sub>2</sub> O | 100                                | 700                          | 100    | 53        | 8            |
| [Cu <sub>24</sub> (Trz) <sub>16</sub> (H <sub>2</sub> O)Cl <sub>4</sub> (HPMo <sub>12</sub> O <sub>40</sub> )]                                                                                                      | 100                                | 525                          | 200    | 68        | 9            |
| Cu <sub>4</sub> (bte) <sub>4</sub> (β-Mo <sub>8</sub> O <sub>26</sub> )                                                                                                                                             | 100                                | 575                          | 100    | 40.4      | 10           |
| Mo <sub>10</sub> V <sub>2</sub> @MIL-101                                                                                                                                                                            | 100                                | 725                          | 100    | 82        | This<br>work |
|                                                                                                                                                                                                                     | 1000                               | 625                          | 300    | 88        |              |

CD = Current density, RC = Reversible capacity, CE = Coulombic efficiency (Initial)



## References

- (1) Yue, Y.; Li, Y.; Bi, Z.; Veith, G. M.; Bridges, C. A.; Guo, B.; Chen, J.; Mullins, D. R.; Surwade, S. P.; Mahurin, S. M.; et al. A POM-Organic Framework Anode for Li-Ion Battery. *J. Mater. Chem. A* **2015**, *3* (45), 22989–22995.
- (2) Li, M.; Cong, L.; Zhao, J.; Zheng, T.; Tian, R.; Sha, J.; Su, Z.; Wang, X. Self-Organization towards Complex Multi-Fold Meso-Helices in the Structures of Wells-Dawson Polyoxometalate-Based Hybrid Materials for Lithium-Ion Batteries. *J. Mater. Chem. A* **2017**, *5* (7), 3371–3376.
- (3) Huang, Q.; Wei, T.; Zhang, M.; Dong, L. Z.; Zhang, A. M.; Li, S. L.; Liu, W. J.; Liu, J.; Lan, Y. Q. A Highly Stable Polyoxometalate-Based Metal-Organic Framework with  $\pi$ - $\pi$  Stacking for Enhancing Lithium Ion Battery Performance. *J. Mater. Chem. A* **2017**, *5* (18), 8477–8483.
- (4) Wang, Y. Y.; Zhang, M.; Li, S. L.; Zhang, S. R.; Xie, W.; Qin, J. S.; Su, Z. M.; Lan, Y. Q. Diamondoid-Structured Polymolybdate-Based Metal-Organic Frameworks as High-Capacity Anodes for Lithium-Ion Batteries. *Chem. Commun.* **2017**, *53* (37), 5204–5207.
- (5) Wei, T.; Zhang, M.; Wu, P.; Tang, Y. J.; Li, S. L.; Shen, F. C.; Wang, X. L.; Zhou, X. P.; Lan, Y. Q. POM-Based Metal-Organic Framework/Reduced Graphene Oxide Nanocomposites with Hybrid Behavior of Battery-Supercapacitor for Superior Lithium Storage. *Nano Energy* **2017**, *34*, 205–214.
- (6) Sun, K.; Li, H.; Ye, H.; Jiang, F.; Zhu, H.; Yin, J. 3D-Structured Polyoxometalate Microcrystals with Enhanced Rate Capability and Cycle Stability for Lithium-Ion Storage. *ACS Appl. Mater. Interfaces* **2018**, *10* (22), 18657–18664.
- (7) Meng, X.; Wang, H. N.; Zou, Y. H.; Wang, L. S.; Zhou, Z. Y. Polyoxometalate-Based Metallogels as Anode Materials for Lithium Ion Batteries. *Dalt. Trans.* **2019**, *48* (28),
- (8) Zhu, P.; Yang, X.; Li, X.; Sheng, N.; Zhang, H.; Zhang, G.; Sha, J. Insights into the Lithium Diffusion Process in a Defect-Containing Porous Crystalline POM@MOF Anode Material. *Dalt. Trans.* **2019**, *49* (1), 79–88.
- (9) Yang, X.; Zhu, P.; Ma, X.; Li, W.; Tan, Z.; Sha, J. Graphite-like Polyoxometalate-Based Metal-Organic Framework as an Efficient Anode for Lithium Ion Batteries. *CrystEngComm* **2020**, *22* (8), 1340–1345.
- (10) Wang, Z.; Bi, R.; Liu, J.; Wang, K.; Mao, F.; Wu, H.; Bu, Y.; Song, N. Polyoxometalate-Based Cu/Zn-MOFs with Diverse Stereo Dimensions as Anode Materials in Lithium Ion Batteries. *Chem. Eng. J.* **2021**, *404*.
